# Supplementary material for: A Flexible Genome-Scale SARS-CoV-2 Clone Resource
Source: Preprints.org preprint supplement (doi:10.20944/preprints202004.0009.v3), 2020-06-16
Supplement: Supplementary file 3 [file SARSCoV2_Clones_Supplementary Table 2.xlsx]

## Sheet: Supplementary table 1
Gene Symbol	Synthesized CDS Name	Protein Type	Status	Putative Function/Domain	Coding Sequence Length	Amino Acid Length	Coding Sequence	Vector Backbone (Selection)	Clone with STOP Codon	Clone without STOP Codon	Clone with TEV
ORF1AB (split into 16 protein)	NSP1	Nonstructural	In collection	Suppress antiviral host response	543	180	ATGGAGAGCCTGGTGCCTGGCTTCAACGAAAAGACCCACGTGCAGCTGTCTCTGCCAGTGCTGCAGGTGCGCGACGTGCTGGTGAGGGGATTCGGTGACTCTGTGGAGGAAGTGCTGTCTGAAGCTAGACAGCACCTGAAGGATGGTACCTGCGGACTGGTGGAGGTGGAAAAGGGCGTGCTGCCCCAGCTGGAGCAGCCTTACGTGTTCATCAAGCGCAGCGATGCTAGGACTGCTCCCCACGGACACGTGATGGTGGAACTGGTGGCCGAGCTGGAAGGTATCCAGTACGGTCGCTCCGGAGAGACCCTGGGTGTGCTGGTGCCACACGTGGGTGAAATCCCCGTGGCTTACAGAAAGGTGCTGCTGCGTAAGAACGGAAACAAGGGTGCCGGCGGA…	pDONR207 (Gentamycin)	Addgene: 141255	Addgene: 149304	Addgene: 154400
	NSP2	Nonstructural	In collection	Unknown. Mutations found in NSP2 suggest this CDS may play a role in infectious capability and differentiation (Guo et al., 2020 [PMID: 32169119]).	1920	639	ATGGCTTACACCCGCTACGTGGACAACAACTTCTGCGGTCCCGACGGCTACCCTCTGGAATGCATCAAGGACCTGCTGGCTAGAGCTGGCAAGGCTAGCTGCACCCTGTCCGAGCAGCTGGACTTCATCGACACCAAGAGAGGAGTGTACTGCTGCCGTGAGCACGAACACGAGATCGCTTGGTACACCGAAAGATCCGAGAAGTCTTACGAGCTGCAGACCCCATTCGAAATCAAGCTGGCCAAGAAGTTCGACACCTTCAACGGCGAGTGCCCAAACTTCGTGTTCCCCCTGAACAGCATCATCAAGACCATCCAGCCCCGTGTGGAGAAGAAGAAGCTGGACGGATTCATGGGTCGCATCCGCAGCGTGTACCCAGTGGCTAGCCCCAACGAATGC…	pDONR223 (Spectinomycin)	Addgene: 141256	Addgene: 149305	Addgene: 154401
	PLPRO (NSP3)	Nonstructural	In collection	Putative PL-pro domain	5841	1946	ATGGCCCCTACCAAGGTGACCTTCGGAGACGACACCGTGATCGAGGTGCAGGGTTACAAGAGCGTGAACATCACCTTCGAGCTGGACGAACGCATCGACAAGGTGCTGAACGAAAAGTGCTCCGCTTACACCGTGGAGCTGGGCACCGAGGTGAACGAATTCGCCTGCGTGGTGGCCGACGCTGTGATCAAGACCCTGCAGCCAGTGTCCGAACTGCTGACCCCTCTGGGTATCGACCTGGACGAGTGGTCTATGGCTACCTACTACCTGTTCGACGAGAGCGGCGAATTCAAGCTGGCCTCTCACATGTACTGCAGCTTCTACCCTCCCGACGAAGACGAGGAAGAGGGTGACTGCGAAGAGGAAGAGTTCGAGCCTTCCACTCAGTACGAGTACGGC…	pDONR207 (Gentamycin)	Addgene: 141257	Addgene: 149306	Addgene: 154402
	NSP4	Nonstructural	In collection	Complex with NSP3 & 6 for DMV (double-membrane vesicle) formation	1506	501	ATGAAGATCGTGAACAACTGGCTGAAGCAGCTGATCAAGGTGACCCTGGTGTTCCTGTTCGTGGCCGCTATCTTCTACCTGATCACCCCTGTGCACGTGATGAGCAAGCACACCGACTTCAGCTCCGAGATCATCGGCTACAAGGCCATCGACGGCGGAGTGACCAGAGACATCGCTTCCACCGACACCTGCTTCGCCAACAAGCACGCTGACTTCGACACCTGGTTCTCCCAGAGAGGTGGCTCTTACACCAACGACAAGGCCTGCCCACTGATCGCCGCTGTGATCACCCGTGAAGTGGGATTCGTGGTGCCTGGCCTGCCAGGAACCATCCTGAGAACCACCAACGGTGACTTCCTGCACTTCCTGCCACGCGTGTTCAGCGCCGTGGGCAACATC…	pDONR223 (Spectinomycin)	Addgene: 141258	Addgene: 149307	Addgene: 154403
	NSP5	Nonstructural	In collection	3CL-pro domain	924	307	ATGTCCGGATTCCGCAAGATGGCCTTCCCTTCTGGCAAGGTGGAGGGCTGCATGGTGCAGGTGACCTGCGGAACCACCACCCTGAACGGTCTGTGGCTGGACGACGTGGTGTACTGCCCCAGGCACGTGATCTGCACCTCTGAGGACATGCTGAACCCTAACTACGAAGACCTGCTGATCAGAAAGAGCAACCACAACTTCCTGGTGCAGGCCGGTAACGTGCAGCTGCGTGTGATCGGCCACTCTATGCAGAACTGCGTGCTGAAGCTGAAGGTGGACACCGCTAACCCCAAGACCCCTAAGTACAAGTTCGTGAGAATCCAGCCTGGTCAGACCTTCTCCGTGCTGGCCTGCTACAACGGAAGCCCATCCGGCGTGTACCAGTGCGCTATGCGTCCC…	pDONR223 (Spectinomycin)	Addgene: 141259	Addgene: 149308	Addgene: 154404
	NSP6	Nonstructural	In collection	Complex with NSP 3 & 4 for DMV formation	876	291	ATGAGCGCCGTGAAGAGAACCATCAAGGGAACCCACCACTGGCTGCTGCTGACCATCCTGACCTCCCTGCTGGTGCTGGTGCAGTCTACCCAGTGGAGCCTGTTCTTCTTCCTGTACGAGAACGCCTTCCTGCCCTTCGCTATGGGTATCATCGCCATGTCCGCCTTCGCTATGATGTTCGTGAAGCACAAGCACGCTTTCCTGTGCCTGTTCCTGCTGCCATCCCTGGCCACCGTGGCTTACTTCAACATGGTGTACATGCCCGCCTCTTGGGTCATGCGCATCATGACCTGGCTGGACATGGTGGACACCAGCCTGTCCGGCTTCAAGCTGAAGGACTGCGTGATGTACGCCTCTGCTGTGGTGCTGCTGATCCTGATGACCGCTAGAACCGTGTAC…	pDONR223 (Spectinomycin)	Addgene: 141260	Addgene: 149309	Addgene: 154405
	NSP7	Nonstructural	In collection	Complex with NSP8: Primase	255	84	ATGAGCAAGATGTCCGACGTGAAGTGCACCTCCGTGGTGCTGCTGTCTGTGCTGCAGCAGCTGCGCGTGGAGAGCTCCTCTAAGCTGTGGGCCCAGTGCGTGCAGCTGCACAACGACATCCTGCTGGCCAAGGACACCACCGAGGCTTTCGAAAAGATGGTGTCTCTGCTGAGCGTGCTGCTGTCCATGCAGGGAGCTGTGGACATCAACAAGCTGTGCGAGGAAATGCTGGACAACAGGGCTACCCTGCAGTAA	pDONR223 (Spectinomycin)	Addgene: 141261	Addgene: 149310	Addgene: 154406
	NSP8	Nonstructural	In collection	Complex with NSP7: Primase	600	199	ATGGCCATCGCTAGCGAGTTCAGCTCCCTGCCTTCCTACGCCGCTTTCGCCACCGCTCAGGAGGCTTACGAACAGGCCGTGGCTAACGGCGACTCCGAAGTGGTGCTGAAGAAGCTGAAGAAGTCCCTGAACGTGGCCAAGTCTGAGTTCGACAGAGACGCCGCTATGCAGCGTAAGCTGGAAAAGATGGCCGACCAGGCTATGACCCAGATGTACAAGCAGGCTCGCTCTGAGGACAAGAGGGCTAAGGTGACCAGCGCCATGCAGACCATGCTGTTCACCATGCTGCGCAAGCTGGACAACGACGCTCTGAACAACATCATCAACAACGCCAGAGACGGCTGCGTGCCCCTGAACATCATCCCTCTGACCACCGCCGCTAAGCTGATGGTGGTCATC…	pDONR223 (Spectinomycin)	Addgene: 141262	Addgene: 149311	Addgene: 154407
	NSP9	Nonstructural	In collection	RNA/DNA binding activity	345	114	ATGAACAACGAGCTGAGCCCTGTGGCCCTGAGACAGATGTCTTGTGCTGCTGGTACCACCCAGACCGCTTGCACCGACGACAACGCCCTGGCTTACTACAACACCACCAAGGGCGGAAGATTCGTGCTGGCCCTGCTGTCTGACCTGCAGGACCTGAAGTGGGCTCGTTTCCCCAAGAGCGACGGTACCGGCACCATCTACACCGAGCTGGAACCCCCTTGCAGATTCGTGACCGACACCCCAAAGGGCCCCAAGGTGAAGTACCTGTACTTCATCAAGGGACTGAACAACCTGAACAGAGGAATGGTGCTGGGTAGCCTGGCTGCTACCGTGAGGCTGCAGTAA	pDONR223 (Spectinomycin)	Addgene: 141263	Addgene: 149312	Addgene: 154408
	NSP10	Nonstructural	In collection	Complex with NSP14: Replication fidelity	423	140	ATGGCTGGTAACGCTACTGAGGTGCCTGCTAACAGCACCGTGCTGTCCTTCTGCGCCTTCGCTGTGGACGCCGCTAAGGCCTACAAGGACTACCTGGCTTCCGGCGGACAGCCTATCACCAACTGCGTGAAGATGCTGTGCACCCACACCGGAACCGGTCAGGCCATCACCGTGACCCCAGAGGCTAACATGGACCAGGAATCTTTCGGTGGCGCCAGCTGCTGCCTGTACTGCAGATGCCACATCGACCACCCCAACCCTAAGGGTTTCTGCGACCTGAAGGGCAAGTACGTGCAGATCCCAACCACCTGCGCTAACGACCCCGTGGGATTCACCCTGAAGAACACCGTGTGCACCGTGTGCGGAATGTGGAAGGGCTACGGATGCTCTTGCGACCAG…	pDONR223 (Spectinomycin)	Addgene: 141264	Addgene: 149313	Addgene: 154409
	NSP11	Nonstructural	Omitted due to short length	Short peptide at the end of orf1a with unknown function	36	12	NA	NA	NA	NA	NA
	RNA-pol (NSP12)	Nonstructural	In collection	RNA-dependent RNA polymerase	2760	919	ATGTCCGCCGCTAGACTGACTCCTTGTGGTACTGGCACCTCTACTGACGTGGTGTACAGGGCCTTCGACATCTACAACGACAAGGTGGCCGGATTCGCTAAGTTCCTGAAGACCAACTGCTGCCGCTTCCAGGAGAAGGACGAAGACGACAACCTGATCGACTCTTACTTCGTGGTGAAGAGGCACACCTTCAGCAACTACCAGCACGAGGAAACCATCTACAACCTGCTGAAGGACTGCCCCGCCGTGGCTAAGCACGACTTCTTCAAGTTCCGCATCGACGGTGACATGGTGCCTCACATCAGCCGCCAGAGGCTGACCAAGTACACCATGGCCGACCTGGTGTACGCTCTGAGGCACTTCGACGAGGGCAACTGCGACACCCTGAAGGAAATCCTG…	pDONR223 (Spectinomycin)	Addgene: 141265	Addgene: 149314	Addgene: 154410
	Heli (NSP13)	Nonstructural	In collection	Helicase	1809	602	ATGGCCGTGGGCGCTTGCGTGCTGTGCAACTCTCAGACCAGCCTGAGATGTGGAGCTTGCATCCGCAGGCCTTTCCTGTGCTGCAAGTGCTGCTACGACCACGTGATCAGCACCTCCCACAAGCTGGTGCTGTCCGTGAACCCATACGTGTGCAACGCTCCTGGTTGTGACGTGACTGACGTGACCCAGCTGTACCTGGGCGGAATGAGCTACTACTGCAAGTCCCACAAGCCCCCTATCAGCTTCCCACTGTGCGCTAACGGCCAGGTGTTCGGACTGTACAAGAACACCTGCGTGGGCTCCGACAACGTGACCGACTTCAACGCCATCGCTACCTGCGACTGGACCAACGCCGGAGACTACATCCTGGCTAACACCTGCACCGAAAGGCTGAAGCTG…	pDONR223 (Spectinomycin)	Addgene: 141266	Addgene: 149315	Addgene: 154411
	NSP14	Nonstructural	In collection	ExoN: 3'-5' exonuclease	1587	528	ATGGCTGAGAACGTGACCGGTCTGTTCAAGGACTGCTCTAAGGTCATCACTGGTCTGCACCCAACTCAGGCTCCAACCCACCTGTCTGTGGACACCAAGTTCAAGACCGAAGGACTGTGCGTGGACATCCCCGGTATCCCTAAGGACATGACCTACCGCAGGCTGATCTCCATGATGGGCTTCAAGATGAACTACCAGGTGAACGGATACCCTAACATGTTCATCACCAGAGAGGAAGCTATCCGCCACGTGAGGGCCTGGATCGGTTTCGACGTGGAAGGTTGCCACGCTACCAGAGAAGCTGTGGGTACCAACCTGCCACTGCAGCTGGGCTTCTCTACCGGAGTGAACCTGGTGGCTGTGCCTACCGGCTACGTGGACACCCCAAACAACACCGAC…	pDONR223 (Spectinomycin)	Addgene: 141267	Addgene: 149316	Addgene: 154412
	NSP15	Nonstructural	In collection	XendoU: poly(U)-Spectinomycinific endoribonuclease	1044	347	ATGTCTCTGGAGAACGTGGCCTTCAACGTGGTGAACAAGGGTCACTTCGACGGTCAGCAGGGCGAAGTGCCTGTGAGCATCATCAACAACACCGTGTACACCAAGGTGGACGGCGTGGACGTGGAGCTGTTCGAAAACAAGACCACCCTGCCAGTGAACGTGGCCTTCGAGCTGTGGGCTAAGCGCAACATCAAGCCCGTGCCTGAAGTGAAGATCCTGAACAACCTGGGAGTGGACATCGCCGCTAACACCGTGATCTGGGACTACAAGAGGGACGCCCCCGCTCACATCAGCACCATCGGCGTGTGCTCCATGACCGACATCGCCAAGAAGCCTACCGAGACCATCTGCGCTCCACTGACCGTGTTCTTCGACGGAAGAGTGGACGGTCAGGTGGAC…	pDONR223 (Spectinomycin)	Addgene: 141268	Addgene: 149317	Addgene: 154413
	NSP16	Nonstructural	In collection	2'-O'-MT: 2'-O-ribo methyltransferase	900	299	ATGTCTTCCCAGGCTTGGCAGCCTGGAGTGGCTATGCCTAACCTGTACAAGATGCAGCGTATGCTGCTGGAGAAGTGCGACCTGCAGAACTACGGAGACTCCGCCACCCTGCCCAAGGGTATCATGATGAACGTGGCTAAGTACACCCAGCTGTGCCAGTACCTGAACACCCTGACCCTGGCCGTGCCTTACAACATGCGCGTGATCCACTTCGGTGCTGGTTCTGACAAGGGAGTGGCTCCAGGTACCGCTGTGCTGAGACAGTGGCTGCCCACCGGTACCCTGCTGGTGGACTCTGACCTGAACGACTTCGTGTCTGATGCTGACAGCACCCTGATCGGCGACTGTGCTACTGTGCACACCGCTAACAAGTGGGACCTGATCATCTCTGACATGTAC…	pDONR223 (Spectinomycin)	Addgene: 141269	Addgene: 149318	Addgene: 154414
S	S	Structural	In collection	Spike glycoprotein trimer that binds to host cell receptor ACE2	3822	1273	ATGTTCGTGTTCCTGGTGCTGCTGCCACTGGTGAGCTCCCAGTGCGTGAACCTGACCACCAGAACCCAGCTGCCACCTGCCTACACCAACTCCTTCACCAGGGGCGTGTACTACCCAGACAAGGTGTTCAGATCCAGCGTGCTGCACTCTACCCAGGACCTGTTCCTGCCATTCTTCTCTAACGTGACCTGGTTCCACGCCATCCACGTGTCTGGAACCAACGGCACCAAGAGATTCGACAACCCAGTGCTGCCATTCAACGACGGCGTGTACTTCGCTTCTACCGAGAAGTCTAACATCATCAGGGGTTGGATCTTCGGAACCACCCTGGACTCTAAGACCCAGTCTCTGCTGATCGTGAACAACGCTACCAACGTGGTGATCAAGGTGTGCGAGTTC…	pDONR223 (Spectinomycin)	Addgene: 149329	Addgene: 152988	Addgene: 154415
S	S-24nt	Structural	In collection	Spike glycoprotein trimer (minus 8 amino acids)	3798	1265	ATGTTCGTCTTCCTGGTCCTGCTGCCTCTGGTCTCCTCACAGTGCGTCAATCTGACAACTCGGACTCAGCTGCCACCTGCTTATACTAATAGCTTCACCAGAGGCGTGTACTATCCTGACAAGGTGTTTAGAAGCTCCGTGCTGCACTCTACACAGGATCTGTTTCTGCCATTCTTTAGCAACGTGACCTGGTTCCACGCCATCCACGTGAGCGGCACCAATGGCACAAAGCGGTTCGACAATCCCGTGCTGCCTTTTAACGATGGCGTGTACTTCGCCTCTACCGAGAAGAGCAACATCATCAGAGGCTGGATCTTTGGCACCACACTGGACTCCAAGACACAGTCTCTGCTGATCGTGAACAATGCCACCAACGTGGTCATCAAGGTGTGCGAGTTC…	pDONR223 (Spectinomycin)	Pending	Pending	NA
S	S-fragment1	Structural	In collection	Entire Ectodomain (No STOP codon)	3639	1213	ATGTTCGTGTTCCTGGTGCTGCTGCCACTGGTGAGCTCCCAGTGCGTGAACCTGACCACCAGAACCCAGCTGCCACCTGCCTACACCAACTCCTTCACCAGGGGCGTGTACTACCCAGACAAGGTGTTCAGATCCAGCGTGCTGCACTCTACCCAGGACCTGTTCCTGCCATTCTTCTCTAACGTGACCTGGTTCCACGCCATCCACGTGTCTGGAACCAACGGCACCAAGAGATTCGACAACCCAGTGCTGCCATTCAACGACGGCGTGTACTTCGCTTCTACCGAGAAGTCTAACATCATCAGGGGTTGGATCTTCGGAACCACCCTGGACTCTAAGACCCAGTCTCTGCTGATCGTGAACAACGCTACCAACGTGGTGATCAAGGTGTGCGAGTTC…	PDONR221 (Kanamycin)	NA	Addgene: 153173	NA
S	S-fragment2	Structural	In collection	Entire Ectodomain without the signal peptide (with 5' Met, No STOP codon)	3597	1199	ATGGTGAACCTGACCACCAGAACCCAGCTGCCACCTGCCTACACCAACTCCTTCACCAGGGGCGTGTACTACCCAGACAAGGTGTTCAGATCCAGCGTGCTGCACTCTACCCAGGACCTGTTCCTGCCATTCTTCTCTAACGTGACCTGGTTCCACGCCATCCACGTGTCTGGAACCAACGGCACCAAGAGATTCGACAACCCAGTGCTGCCATTCAACGACGGCGTGTACTTCGCTTCTACCGAGAAGTCTAACATCATCAGGGGTTGGATCTTCGGAACCACCCTGGACTCTAAGACCCAGTCTCTGCTGATCGTGAACAACGCTACCAACGTGGTGATCAAGGTGTGCGAGTTCCAGTTCTGCAACGACCCATTCCTGGGAGTGTACTACCACAAG…	PDONR221 (Kanamycin)	NA	Addgene: 153174	NA
S	S-fragment3	Structural	In collection	N-term fragment after the furin cleavage (No STOP codon)	2058	686	ATGTTCGTGTTCCTGGTGCTGCTGCCACTGGTGAGCTCCCAGTGCGTGAACCTGACCACCAGAACCCAGCTGCCACCTGCCTACACCAACTCCTTCACCAGGGGCGTGTACTACCCAGACAAGGTGTTCAGATCCAGCGTGCTGCACTCTACCCAGGACCTGTTCCTGCCATTCTTCTCTAACGTGACCTGGTTCCACGCCATCCACGTGTCTGGAACCAACGGCACCAAGAGATTCGACAACCCAGTGCTGCCATTCAACGACGGCGTGTACTTCGCTTCTACCGAGAAGTCTAACATCATCAGGGGTTGGATCTTCGGAACCACCCTGGACTCTAAGACCCAGTCTCTGCTGATCGTGAACAACGCTACCAACGTGGTGATCAAGGTGTGCGAGTTC…	PDONR221 (Kanamycin)	NA	Addgene: 153175	NA
S	S-fragment4	Structural	In collection	N-term fragment after the furin cleavage without the signal peptide (with 5' met, No STOP codon)	2016	672	ATGGTGAACCTGACCACCAGAACCCAGCTGCCACCTGCCTACACCAACTCCTTCACCAGGGGCGTGTACTACCCAGACAAGGTGTTCAGATCCAGCGTGCTGCACTCTACCCAGGACCTGTTCCTGCCATTCTTCTCTAACGTGACCTGGTTCCACGCCATCCACGTGTCTGGAACCAACGGCACCAAGAGATTCGACAACCCAGTGCTGCCATTCAACGACGGCGTGTACTTCGCTTCTACCGAGAAGTCTAACATCATCAGGGGTTGGATCTTCGGAACCACCCTGGACTCTAAGACCCAGTCTCTGCTGATCGTGAACAACGCTACCAACGTGGTGATCAAGGTGTGCGAGTTCCAGTTCTGCAACGACCCATTCCTGGGAGTGTACTACCACAAG…	PDONR221 (Kanamycin)	NA	Addgene: 153176	NA
S	S-fragment5	Structural	In collection	C-terminal Ectodomain from the furin cleavage site (with 5' Met, No STOP codon)	1584	528	ATGGTGGCCTCTCAGAGCATCATCGCCTACACCATGAGCCTGGGCGCTGAAAACAGCGTGGCTTACAGCAACAACTCTATCGCCATCCCAACCAACTTCACCATCTCTGTGACCACCGAAATCCTGCCAGTGAGCATGACCAAGACCAGCGTGGACTGCACCATGTACATCTGCGGAGACTCTACCGAATGCTCTAACCTGCTGCTGCAGTACGGCAGCTTCTGCACCCAGCTGAACCGCGCTCTGACCGGAATCGCTGTGGAGCAGGACAAGAACACCCAGGAAGTGTTCGCTCAGGTGAAGCAGATATACAAGACCCCACCTATCAAGGACTTCGGAGGATTCAACTTCTCTCAGATCCTGCCCGACCCATCTAAGCCCTCTAAGAGGTCTTTCATC…	PDONR221 (Kanamycin)	NA	Addgene: 153177	NA
S	S-fragment6	Structural	In collection	C-terminal Ectodomain from the Tmpress 2 priming site (with 5' Met, No STOP codon)	1197	399	ATGTCTTTCATCGAAGACCTGCTGTTCAACAAGGTGACCCTGGCCGACGCCGGTTTCATCAAGCAGTACGGTGACTGCCTGGGAGACATCGCCGCTAGAGACCTGATCTGCGCCCAGAAGTTCAACGGTCTGACCGTGCTGCCACCACTGCTGACCGACGAGATGATCGCCCAGTACACCTCTGCCCTGCTGGCTGGAACCATCACCTCTGGTTGGACCTTCGGAGCTGGCGCCGCCCTGCAGATCCCATTCGCTATGCAGATGGCCTACCGTTTCAACGGTATCGGAGTGACCCAGAACGTGCTGTACGAAAACCAGAAGCTGATCGCTAACCAGTTCAACTCTGCTATCGGAAAGATCCAGGACTCCCTGTCCTCTACCGCTTCTGCCCTGGGAAAG…	PDONR221 (Kanamycin)	NA	Addgene: 153184	NA
ORF3A	3A	Accessory	In collection	Activate inflammatory response and induce apoptosis	828	275	ATGGACCTGTTCATGAGAATCTTCACCATCGGCACCGTGACCCTGAAGCAGGGAGAGATCAAGGACGCCACCCCTTCTGACTTCGTGCGTGCCACCGCTACCATCCCAATCCAGGCTAGCCTGCCCTTCGGATGGCTGATCGTGGGTGTGGCCCTGCTGGCCGTGTTCCAGTCCGCCTCTAAGATCATCACCCTGAAGAAGAGGTGGCAGCTGGCTCTGTCCAAGGGTGTGCACTTCGTGTGCAACCTGCTGCTGCTGTTCGTGACCGTGTACTCACACCTGCTGCTGGTGGCTGCTGGTCTGGAGGCTCCATTCCTGTACCTGTACGCTCTGGTGTACTTCCTGCAGAGCATCAACTTCGTGCGCATCATCATGAGGCTGTGGCTGTGCTGGAAGTGC…	pDONR207 (Gentamycin)	Addgene: 141271	Addgene: 149319	Addgene: 154416
ORF3B	3B	Accessory	In collection	Activate inflammatory response and inhibit the expression of IFNβ	174	58	ATGGCCTACTGCTGGCGCTGCACCAGCTGCTGCTTCTCCGAGAGGTTCCAGAACCACAACCCCCAGAAGGAAATGGCTACCTCTACCCTGCAGGGTTGTTCTCTGTGCCTGCAGCTGGCTGTGGTGGTGTGCAACAGCCTGCTGACCCCCTTCGCTAGATGCTGCTGGCCTTAA	pDONR223 (Spectinomycin)	Addgene: 141272	Addgene: 149320	Addgene: 154417
E	E	Structural	In collection	Envelope protein pentamer	228	75	ATGTACTCTTTCGTGAGCGAGGAAACCGGCACCCTGATCGTGAACTCCGTGCTGCTGTTCCTGGCCTTCGTGGTGTTCCTGCTGGTGACCCTGGCTATCCTGACCGCTCTGAGACTGTGCGCTTACTGCTGCAACATCGTGAACGTGTCCCTGGTGAAGCCCTCTTTCTACGTGTACAGCCGCGTGAAGAACCTGAACAGCTCCAGGGTGCCTGACCTGCTGGTGTAA	pDONR207 (Gentamycin)	Addgene: 141273	Addgene: 149321	Addgene: 154418
E	E-27nt	Structural	In collection	Envelope protein pentamer (minus 9 amino acids)	201	66	ATGTACTCTTTCGTGAACTCCGTGCTGCTGTTCCTGGCCTTCGTGGTGTTCCTGCTGGTGACCCTGGCTATCCTGACCGCTCTGAGACTGTGCGCTTACTGCTGCAACATCGTGAACGTGTCCCTGGTGAAGCCCTCTTTCTACGTGTACAGCCGCGTGAAGAACCTGAACAGCTCCAGGGTGCCTGACCTGCTGGTGTAA	pDONR207 (Gentamycin)	Pending	Pending	NA
M	M	Structural	In collection	Membrane protein	669	222	ATGGCTGACTCTAACGGTACCATCACCGTGGAGGAACTGAAGAAGCTGCTGGAGCAGTGGAACCTGGTCATCGGCTTCCTGTTCCTGACCTGGATCTGCCTGCTGCAGTTCGCCTACGCTAACCGCAACAGGTTCCTGTACATCATCAAGCTGATCTTCCTGTGGCTGCTGTGGCCTGTGACCCTGGCTTGCTTCGTGCTGGCTGCCGTGTACCGCATCAACTGGATCACCGGCGGAATCGCCATCGCTATGGCCTGCCTGGTGGGCCTGATGTGGCTGTCTTACTTCATCGCTAGCTTCAGGCTGTTCGCCAGAACCCGTTCCATGTGGTCTTTCAACCCCGAGACCAACATCCTGCTGAACGTGCCTCTGCACGGAACCATCCTGACCAGACCACTG…	pDONR207 (Gentamycin)	Addgene: 141274	Addgene: 149322	Addgene: 154419
ORF6	6	Accessory	In collection	Antagonize STAT1 function & IFN signalling and induce DNA synthesis	186	61	ATGTTCCACCTGGTGGACTTCCAGGTGACCATCGCCGAGATCCTGCTGATCATCATGCGCACCTTCAAGGTGTCTATCTGGAACCTGGACTACATCATCAACCTGATCATCAAGAACCTGAGCAAGTCCCTGACCGAGAACAAGTACAGCCAGCTGGACGAGGAACAGCCCATGGAAATCGACTAA	pDONR223 (Spectinomycin)	Addgene: 141275	Addgene: 149323	Addgene: 154420
ORF7A	7A	Accessory	In collection	Induce inflammatory response and induce apoptosis	366	121	ATGAAGATCATCCTGTTCCTGGCCCTGATCACCCTGGCTACCTGCGAGCTGTACCACTACCAGGAATGCGTGCGCGGTACCACCGTGCTGCTGAAGGAGCCTTGCAGCTCCGGCACCTACGAAGGAAACTCCCCCTTCCACCCTCTGGCCGACAACAAGTTCGCTCTGACCTGCTTCTCTACTCAGTTCGCCTTCGCTTGCCCTGATGGTGTGAAGCACGTGTACCAGCTGCGCGCCAGGTCTGTGAGCCCAAAGCTGTTCATCAGACAGGAGGAAGTGCAGGAGCTGTACAGCCCCATCTTCCTGATCGTGGCCGCTATCGTGTTCATCACCCTGTGCTTCACCCTGAAGCGTAAGACCGAATAA	pDONR207 (Gentamycin)	Addgene: 141276	Addgene: 149324	Addgene: 154421
ORF7B	7B	Accessory	In collection	Induce inflammatory response	132	43	ATGATCGAGCTGAGCCTGATCGACTTCTACCTGTGCTTCCTGGCCTTCCTGCTGTTCCTGGTGCTGATCATGCTGATCATCTTCTGGTTCTCCCTGGAGCTGCAGGACCACAACGAAACCTGCCACGCTTAA	pDONR223 (Spectinomycin)	Addgene: 141277	Addgene: 149325	Addgene: 154422
ORF7B	7B-truncated	Accessory	In collection	Induce inflammatory response (with N terminus truncated)	63	20	ATGCTGATCATCTTCTGGTTCTCCCTGGAGCTGCAGGACCACAACGAAACCTGCCACGCTTAA	pDONR223 (Spectinomycin)	Pending	Pending	NA
ORF8	8	Accessory	In collection	Induce apoptosis and DNA synthesis	366	121	ATGAAGTTCCTGGTGTTCCTGGGTATCATCACCACCGTGGCCGCTTTCCACCAGGAGTGCTCTCTGCAGAGCTGCACCCAGCACCAGCCATACGTGGTGGATGACCCATGCCCTATCCACTTCTACAGCAAGTGGTACATCAGAGTGGGAGCTAGGAAGTCCGCTCCTCTGATCGAGCTGTGCGTGGACGAAGCCGGCAGCAAGTCCCCAATCCAGTACATCGACATCGGAAACTACACCGTGTCTTGCCTGCCATTCACCATCAACTGCCAGGAACCCAAGCTGGGCTCCCTGGTGGTGAGATGCTCTTTCTACGAGGACTTCCTGGAATACCACGACGTGCGTGTGGTGCTGGACTTCATCTAA	pDONR223 (Spectinomycin)	Addgene: 141278	Addgene: 149326	Addgene: 154423
N	N	Structural	In collection	Facilitate viral RNA packaging	1260	419	ATGTCCGACAACGGTCCCCAGAACCAGCGTAACGCTCCAAGGATCACCTTCGGTGGACCTAGCGACTCCACCGGCAGCAACCAGAACGGAGAACGCTCCGGAGCCAGAAGCAAGCAGCGTAGGCCACAGGGCCTGCCTAACAACACCGCCAGCTGGTTCACCGCTCTGACCCAGCACGGAAAGGAAGACCTGAAGTTCCCAAGGGGACAGGGCGTGCCAATCAACACCAACAGCTCTCCAGACGACCAGATCGGATACTACAGGCGTGCCACCAGGCGCATCAGAGGAGGCGACGGAAAGATGAAGGACCTGTCTCCTAGGTGGTACTTCTACTACCTGGGCACCGGACCAGAGGCTGGTCTGCCATACGGCGCCAACAAGGACGGCATCATCTGGGTG…	pDONR223 (Spectinomycin)	Addgene: 149330	Addgene: 152987	Addgene: 154424
ORF9B	9B	Accessory	In collection	Induce apoptosis	294	98	ATGGACCCAAAGATCTCTGAAATGCACCCCGCTCTGAGACTGGTGGACCCTCAGATCCAGCTGGCCGTGACCCGCATGGAAAACGCTGTGGGCAGGGACCAGAACAACGTGGGACCCAAGGTGTACCCTATCATCCTGAGACTGGGCAGCCCTCTGTCCCTGAACATGGCCCGTAAGACCCTGAACAGCCTGGAGGACAAGGCCTTCCAGCTGACCCCAATCGCTGTGCAGATGACCAAGCTGGCCACCACCGAGGAACTGCCCGACGAATTCGTGGTGGTGACCGTGAAGTAA	pDONR223 (Spectinomycin)	Addgene: 141280	Addgene: 149327	Addgene: 154425
ORF9Bwu	9Bwu	Accessory	In collection	Membrane interactions during virus assembly (based on SARS-COV homolog analysis)	222	73	ATGCTGCAATCGTGCTACAACTTCCTCAAGGAACAACATTGCCAAAAGGCTTCTACGCAGAAGGGAGCAGAGGCGGCAGTCAAGCCTCTTCTCGTTCCTCATCACGTAGTCGCAACAGTTCAAGAAATTCAACTCCAGGCAGCAGTAGGGGAACTTCTCCTGCTAGAATGGCTGGCAATGGCGGTGATGCTGCTCTTGCTTTGCTGCTGCTTGACAGATTGA	pDONR223 (Spectinomycin)	Addgene: 149331	Addgene: 149328	NA
ORF10wu	10wu	Accessory	In collection	Unknown. Expression not detected by direct RNA-seq	117	38	ATGGGCTACATCAACGTGTTCGCCTTCCCCTTCACCATCTACAGCCTGCTGCTGTGCCGCATGAACTCCAGGAACTACATCGCTCAGGTGGACGTGGTGAACTTCAACCTGACCTAA	pDONR223 (Spectinomycin)	Addgene: 149332	Addgene: 152986	NA
